# Supplementary material for: Photoresponsive melamine·barbiturate hydrogen-bonded assembly
Source: Royal Society of Chemistry journal article supplement (doi:10.1039/b305528k), 2003-01-01
Supplement: b305528k.doc [file b305528k.doc]

# Electronic Supplementary Information for:

**Photoresponsive melamine·barbiturate hydrogen-bonded assembly**

# Shiki Yagai,* Takashi Karatsu and Akihide Kitamura*

Department of Materials Technology, Faculty of Engineering, Chiba University, 1-33 Yayoi-cho, Inage-ku, Chiba 263-8522, Japan

# Synthesis and characterization of melamine 1

4-Aminoazobenzene (1.07 g, 5.4 mmol) was added to a solution of cyanuric chloride (1g, 5.4 mmol) and *N*,*N*-diisopropylethylamine (4.5 ml) in THF (60 ml) in portions and the mixture was refluxed overnight under N2. The solvent was evaporated, and the residue was redissolved in ethyl acetate and washed with brine. The organic layer was dried over Na2SO4, filtered, and concentrated in vacuo to give crude **3** as orange powder This material was used for following reaction without any purification.

All of the above crude **3** was suspended in a mixture of dioxane (10 ml) and NH4OH (6.6 ml). The mixture was sealed in a vessel and heated in 110 °C overnight. After cooling and depressurization, excess NH3 and dioxane in the mixture was removed by the stream of N2 to form precipitates of **1**. The precipitates were collected by filtration and washed with water several times, dried in vacuo. Purification of the precipitates by column chromatography over silica gel (eluents, 3% MeOH-CH2Cl2) afforded 2.1 g of pure compound **1** in 81 % yield in the above two steps.

1H NMR (CDCl3)  = 7.95 (4H, dt, *J* = 9, 2 Hz, ), 7.90 (4H, dt, *J* = 7, 2 Hz), 7.77 (4H, dt, *J* = 9, 2 Hz), 7.51 (4H, tt, *J* = 7, 2 Hz), 7.45 (2H, tt, *J* = 7, 2Hz), 7.07 (2H, br-s, NH), 5.07 (2H, br-s, NH2). MS (FAB) calcd for C27H22N10 487 (M+), found 487.

1H NMR spectrum of **1EE** in CDCl3.

1H NMR spectra of the assembly of **1** and **2** in CDCl3 ([**1**] = [**2**] = 40 mM) before (upper) and immediately after irradiation (lower).
